# Supplementary material for: Protein biomarkers distinguish between high- and low-risk pediatric acute lymphoblastic leukemia in a tissue specific manner
Source: PubMed Central journal article supplement (PMC3717072; doi:10.1186/1756-8722-6-52), 2013-07-12
Supplement: 1756-8722-6-52-S1.pdf [file 1756-8722-6-52-S1.pdf]

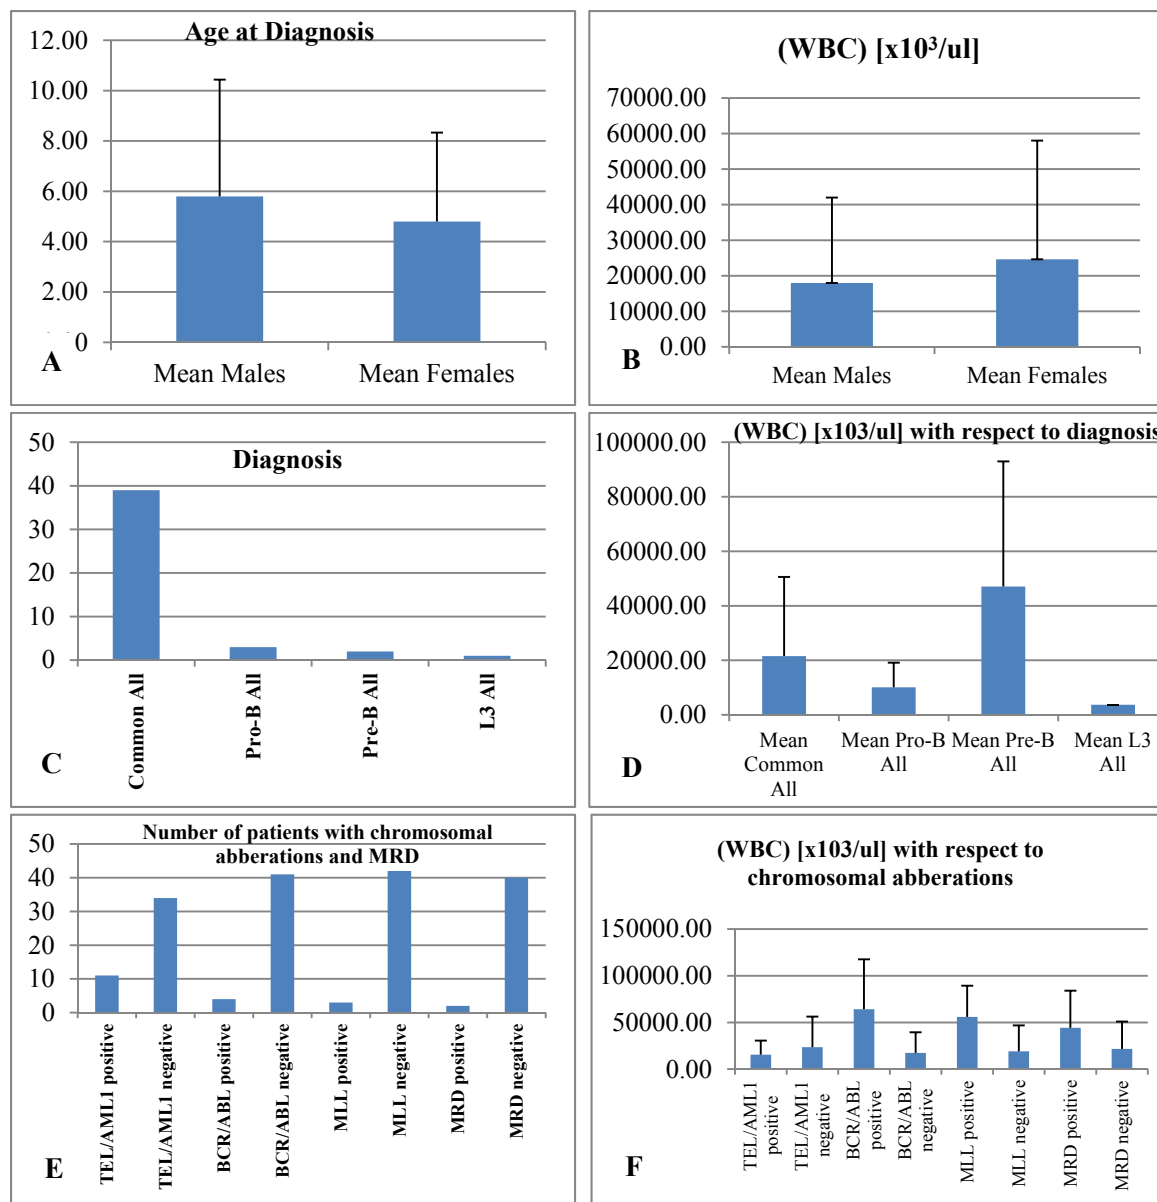

**Supplementary Figure 1.** Summary of patient clinical data: mean age of males and females (A), mean white blood cell count in males and females (B), number of children diagnosed (C), mean white blood cell count with respect to diagnosis (D), number of children with known chromosomal aberrations (E), mean white blood cell count with respect to chromosomal aberrations (F).
