# Supplementary material for: Protein biomarkers distinguish between high- and low-risk pediatric acute lymphoblastic leukemia in a tissue specific manner
Source: PubMed Central journal article supplement (PMC3717072; doi:10.1186/1756-8722-6-52), 2013-07-12
Supplement: 1756-8722-6-52-S6.pdf [file 1756-8722-6-52-S6.pdf]

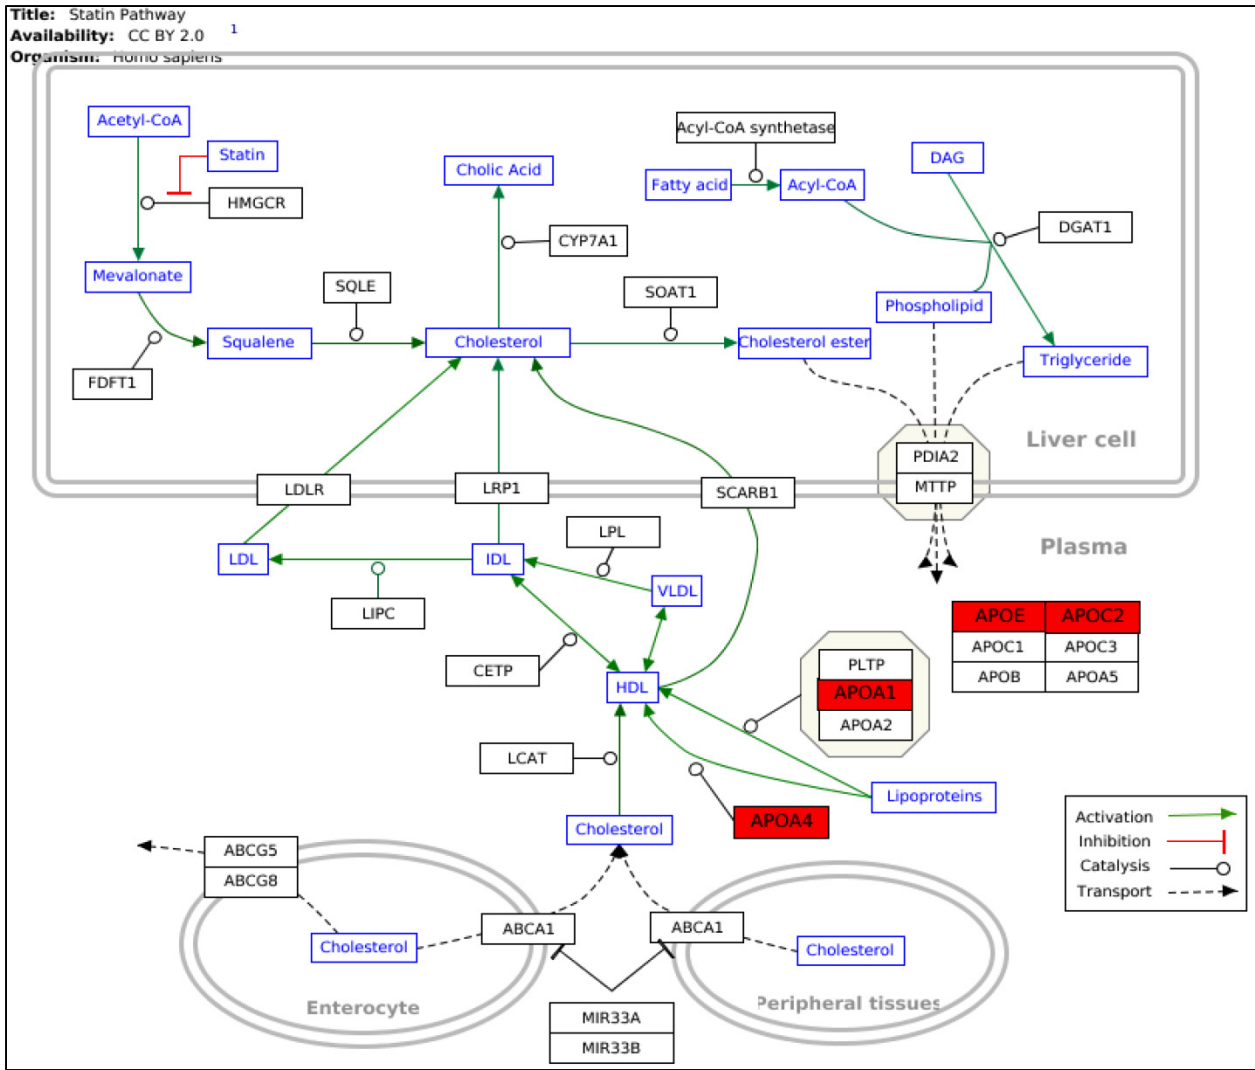

**Supplementary Figure 4.** Four proteins, significant with respect to risk stratification, participate in the statin pathway, which is involved in cholesterol regulation and lipoprotein remodeling, as it also appeared from the GO analysis. The figure was constructed using WebGestalt web-tool [24].
